# Supplementary material for: Antimicrobial Volatiles of the Insect Pathogen Metarhizium brunneum
Source: MDPI journal article supplement (doi:10.3390/jof8040326), 2022-03-22
Supplement: s1 [file s1]

### Antimicrobial volatiles of the insect-pathogen *Metarhizium brunneum*

Hummadi, E. H., Cetin, Y., Demirbek, M., Kardar, N.M., Khan, S., Coates, C.J., Eastwood, D.C., Dudley, E., Maffei, T., Loveridge, E.J. & Butt, T.M.

**Table S1.** *Metarhizium brunneum* volatile organic compounds (VOCs) tested for biocidal activity.

| VOC (purity)                   | Synonyms                                                                                                      | CAS Number | MW (g/mol) | Molecular formula                             |
|--------------------------------|---------------------------------------------------------------------------------------------------------------|------------|------------|-----------------------------------------------|
| Isoamyl alcohol (99%)          | 3-Methyl-1-butanol, Isopentyl alcohol                                                                         | 123-51-3   | 88.15      | C <sub>5</sub> H <sub>12</sub> O              |
| Isoamyl formate (95%)          | Isopentyl formate, 3-Methylbutyl formate, Isoamyl methanoate, Isopentyl methanoate, formic acid isoamyl ester | 110-45-2   | 116.16     | C <sub>6</sub> H <sub>12</sub> O <sub>2</sub> |
| Methyl isovalerate (98%)       | Methyl Isopentanoate, Methyl 3-methylbutanoate, Isovaleric acid methyl ester                                  | 556-24-1   | 116.16     | C <sub>6</sub> H <sub>12</sub> O <sub>2</sub> |
| 3-Octanone (98%)               | Ethyl amyl ketone, Ethyl pentyl ketone                                                                        | 106-68-3   | 128.21     | C <sub>8</sub> H <sub>16</sub> O              |
| (R)-(+)-Limonene (97%)         | (+)-p-Mentha-1,8-diene, (+)-Carvene, (R)-4-Isopropenyl-1-methyl-1-cyclohexene                                 | 5989-27-5  | 136.23     | C <sub>10</sub> H <sub>16</sub>               |
| Isovaleric acid (99%)          | 3-Methylbutanoic acid, 3-Methylbutyric acid                                                                   | 503-74-2   | 102.13     | C <sub>5</sub> H <sub>10</sub> O <sub>2</sub> |
| 1-Octen-3-ol (98%)             | Pentyl vinyl carbinol                                                                                         | 3391-86-4  | 128.21     | C <sub>8</sub> H <sub>16</sub> O              |
| Farnesene (mixture of isomers) | $\alpha$ -Farnesene, 3,7,11-trimethyl-1,3,6,10-dodecatetraene                                                 | 502-61-4   | 204.35     | C <sub>15</sub> H <sub>24</sub>               |
| (-)- $\alpha$ -Cedrene (95%)   | (1S,2R,5S)-2,6,6,8-Tetramethyltricyclo[5.3.1.0 <sup>1,5</sup> ]undec-8-ene                                    | 469-61-4   | 204.35     | C <sub>15</sub> H <sub>24</sub>               |
| 2,3-Butanediol (98%)           | 2,3-Butylene glycol                                                                                           | 513-85-9   | 90.12      | C <sub>4</sub> H <sub>10</sub> O <sub>2</sub> |
| 1-Octene (98%)                 | Octene-1, Octylene; n-octene, Hexylethylene, Oct-1-ene                                                        | 111-66-0   | 112.21     | C <sub>8</sub> H <sub>16</sub>                |
| Undecane (99%)                 | n-Undecane, Hendecane                                                                                         | 1120-21-4  | 156.31     | C <sub>11</sub> H <sub>24</sub>               |
| Tridecane (99%)                | n-Tridecane                                                                                                   | 629-50-5   | 184.36     | C <sub>13</sub> H <sub>28</sub>               |
| Damascenone (98%)              | $\beta$ -Damascenone, 1-(2,6,6-Trimethylcyclohexa-1,3-dien-1-yl)-2-buten-1-one                                | 23696-85-7 | 190.28     | C <sub>13</sub> H <sub>18</sub> O             |

## Supplementary information

**Table S2.** Bacterial, fungal and oomycete targets used to test VOC potency.

| Microbe                                                                   | Group    | Ecological significance                                                          | Source                                |
|---------------------------------------------------------------------------|----------|----------------------------------------------------------------------------------|---------------------------------------|
| <i>Micrococcus luteus</i> , NCIB 8553                                     | Gram +   | Widespread (soil, water, skin flora)                                             | Llinos Harris, Swansea University     |
| <i>Escherichia coli</i> , NCIB 8277                                       | Gram –   | Human Intestine                                                                  | Llinos Harris, Swansea University     |
| <i>Pantoea agglomerans</i> , NCTC 9381                                    | Gram –   | Widespread (soil, plants, insect gut), plant pathogen (fire blight)              | Llinos Harris, Swansea University     |
| <i>Bacillus megaterium</i> , NCIB 10342                                   | Gram +   | Soil bacterium, BCA use to control plant diseases and plant parasitic nematodes. | Llinos Harris, Swansea University     |
| <i>Bacillus subtilis</i> , NCIB 3610                                      | Gram +   | Soil bacterium, commensal in human gut                                           | Llinos Harris, Swansea University     |
| <i>B. thuringiensis</i> subsp. <i>Galleria</i> (H-serotype V) strain 69-6 | Gram +   | Soil bacterium, BCA used to control insect pests                                 | ISEA bacterial collection             |
| <i>Pseudomonas aeruginosa</i> , PA01                                      | Gram –   | Widespread (soil, water, skin flora)                                             | Angus Buckling, Oxford University     |
| <i>Staphylococcus aureus</i> , ATCC 6538P                                 | Gram +   | Human and animal surfaces                                                        | American Type Culture Collection      |
| <i>Candida albicans</i> , NCYC 3778                                       | Yeast    | Human pathogen                                                                   | National Collection of Yeast Cultures |
| <i>Candida glabrata</i> , NCYC 3537                                       | Yeast    | Human pathogen                                                                   | National Collection of Yeast Cultures |
| <i>Pythium ultimum</i>                                                    | Oomycete | Plant pathogen (Damping off)                                                     | Jane Nicklin, University of London    |
| <i>Botrytis cinerea</i>                                                   | Fungus   | Plant pathogen (Gray mould)                                                      | Naresh Magan, Cranfield University    |
| <i>Fusarium graminearum</i>                                               | Fungus   | Plant pathogen (Cereal head blight)                                              | Naresh Magan, Cranfield University    |

**Table S3.** *Metarhizium brunneum* VOCs identified by NIST . The list shows compounds produced independent of strain, developmental stage (mycelium vs conidia), production *in vivo* or *in vitro*. The list includes compounds produced consistently as well as those produced intermittantly.

| Compound                                 | MW<br>(g/mol) | Compound                                 | MW<br>(g/mol) |
|------------------------------------------|---------------|------------------------------------------|---------------|
| <b>Alkanes</b>                           |               | <b>Esters</b>                            |               |
| Pentane                                  | 72.15         | Ethyl acetate                            | 88.10         |
| Heptane                                  | 100.21        | Isoamyl formate                          | 116.15        |
| Octane                                   | 114.23        | Methyl isovalerate                       | 116.15        |
| 1-Methyl-2-pentylcyclohexane             | 168.32        | Isoamyl acetate                          | 130.18        |
| Dodecane                                 | 170.34        | Methyl (3-hydroxycyclopentyl)<br>acetate | 158           |
| 3-Methyltridecane                        | 198.39        | Methyl 2-ethylhexanoate                  | 172.26        |
| 5-Methyltridecane                        | 198.38        | <b>Monoterpenes</b>                      |               |
| Tetradecane                              | 198.39        | Limonene                                 | 136.24        |
| 7-Methylpentadecane                      | 226.44        | Limonene-6-ol pivalate                   | 236.35        |
| Hexadecane                               | 226.44        | <b>Sesquiterpenes</b>                    |               |
| Eicosane                                 | 282.55        | Acoradiene                               | 204.35        |
| 3-Methyleicosane                         | 296.57        | Bergamotene                              | 204.35        |
| <b>Alkenes</b>                           |               | Bisabolene                               | 204.35        |
| 1-Octene                                 | 112.24        | Cardinene                                | 204.35        |
| 1,3-Octadiene                            | 110.2         | Cedrene                                  | 204.35        |
| 2-ethenyl-1,3,3-<br>trimethylcyclohexene | 150.26        | Chamigene                                | 204.35        |
| 1-Undecene                               | 154.29        | Copaene                                  | 204.35        |
| 4,4-dimethyl-2-neopentyl-1-pentene       | 168.31        | Cubebene                                 | 204.35        |
| <b>Alcohols</b>                          |               | Di-epi- $\alpha$ -cedrene                | 204.35        |
| Isoamyl alcohol                          | 88.14         | Elemene                                  | 204.35        |
| 2,3-butanediol                           | 90.12         | Farnesene                                | 204.36        |
| 2-Phenylethanol                          | 122.16        | Himachala-2,4-diene                      | 204.35        |
| 1-Octen-3-ol                             | 128.22        | Himachalene                              | 204.35        |
| <b>Ketones</b>                           |               | Isocaryophyllene                         | 204.35        |
| 3-Octanone                               | 128.21        | Isoledene                                | 204.35        |
| 5,9-dimethyl-5,8-decadiene-2-one         | 180           | Patchoulene                              | 204.35        |
| <b>Carboxylic acids</b>                  |               | $\beta$ -sesquiphellandrene              | 204.35        |
| Acetic acid                              | 605           | Thujopsene                               | 204.35        |
| Isovaleric acid                          | 102.13        | Valencene                                | 204.35        |
| 2-Methylhexanoic acid                    | 130.18        | $\alpha$ -seinenene                      | 204.35        |
| <b>Other compounds</b>                   |               | $\alpha$ -zingiberene                    | 204.35        |
| 3-Hydroxy-2-butanone                     | 88.10         | Cubenol                                  | 222.37        |
| Methoxybenzene                           | 108.14        | $\alpha$ -bisaboial                      | 222.37        |
| Dimethoxybenzene                         | 138.17        | Damascenone                              | 190.29        |

# Supplementary information

**Table S4.** VOCs produced by *Metarhizium brunneum* ARSEF4556, ARSEF3297 and V275 on different substrates. The percentage values are proportional to the compound with the highest peak (100%) in the chromatogram. (Values are means of 5 replicates). Abbreviations: Rt = Retention time, MW = Molecular weight, OSM = Osmotic Stress Medium, HCN = High C:N medium, ICN = Intermediate C:N medium, LCN = Low C:N medium, – = Not observed in this medium, \* = Authentic compounds having the same RT and MS as synthetic standard, Tr. = Trace amount.

| Compound                        | R <sub>t</sub> (min) | MW  | ARSEF 4556<br>(After 7 days – no conidia) |      |       |      | ARSEF 4556<br>(After 14 days – conidia) |       |       |      | V275<br>(After 7 days) |       |       |       | V275<br>(After 14 days) |       |       |       | ARSEF 3297<br>(After 7 days) |      |      |       | ARSEF 3297<br>(After 14 days) |     |      |     |
|---------------------------------|----------------------|-----|-------------------------------------------|------|-------|------|-----------------------------------------|-------|-------|------|------------------------|-------|-------|-------|-------------------------|-------|-------|-------|------------------------------|------|------|-------|-------------------------------|-----|------|-----|
|                                 |                      |     | OSM                                       | HCN  | ICN   | LCN  | OSM                                     | HCN   | ICN   | LCN  | OSM                    | HCN   | ICN   | LCN   | OSM                     | HCN   | ICN   | LCN   | OSM                          | HCN  | ICN  | LCN   | OSM                           | HCN | ICN  | LCN |
| Pentane*                        |                      | 72  | -                                         | -    | -     | -    | 65.15                                   | -     | -     | -    | -                      | -     | -     | -     | -                       | -     | -     | -     | -                            | -    | -    | -     | -                             | -   | -    | -   |
| Ethyl acetate*                  |                      | 88  | -                                         | -    | -     | -    | -                                       | -     | -     | -    | -                      | 43.04 | 37.95 | 16.42 | -                       | -     | -     | -     | -                            | -    | -    | -     | -                             | -   | -    | -   |
| Acetic acid*                    |                      | 60  | -                                         | 100  | 100   | 100  | -                                       | -     | -     | -    | 100                    | 85.76 | -     | -     | -                       | -     | -     | -     | 100                          | 100  | 100  | 100   | -                             | -   | -    | -   |
| Heptane*                        | 1.534                | 100 | -                                         | -    | -     | -    | 22.60                                   | -     | -     | -    | -                      | -     | -     | -     | -                       | -     | -     | -     | -                            | -    | -    | -     | -                             | -   | -    | -   |
| 3-hydroxy-2-butanone* (Acetoin) | 2.015                | 88  | -                                         | -    | -     | -    | -                                       | -     | -     | -    | -                      | 49.38 | 33.58 | 32.25 | -                       | 57.9  | 73.73 | 100   | -                            | -    | -    | -     | -                             | -   | -    | -   |
| Isoamyl alcohol*                | 2.075                | 88  | 100                                       | -    | -     | -    | 61.85                                   | -     | -     | -    | 2.30                   | 20.44 | 100   | 100   | -                       | -     | -     | -     | 34.29                        | -    | -    | -     | -                             | -   | -    | -   |
| Isoamyl formate*                | 2.770                | 116 | -                                         | -    | -     | -    | -                                       | -     | -     | -    | -                      | -     | 4.88  | -     | -                       | -     | -     | -     | -                            | -    | -    | -     | -                             | -   | -    | -   |
| Methyl isovalerate*             | 2.945                | 116 | -                                         | -    | -     | -    | -                                       | -     | -     | -    | -                      | -     | 2.01  | -     | -                       | -     | -     | -     | -                            | -    | -    | 6.73  | -                             | -   | -    | -   |
| 1-Octene*                       | 3.520                | 112 | -                                         | -    | -     | -    | -                                       | 0.86  | 1.62  | -    | -                      | -     | -     | -     | 11.13                   | 2.67  | 102   | 3.89  | -                            | -    | -    | -     | 8.27                          | -   | 6.62 | -   |
| Octane*                         | 4.123                | 114 | -                                         | -    | -     | -    | 10.70                                   | 0.57  | 1.12  | 25.6 | -                      | -     | -     | -     | -                       | -     | -     | -     | -                            | -    | -    | -     | -                             | -   | -    | -   |
| 2,3-butanediol* (R or S isomer) | 4.168                | 90  | -                                         | -    | -     | -    | -                                       | -     | -     | -    | -                      | Tr.   | Tr.   | -     | -                       | 43.43 | 44.49 | 4.16  | -                            | -    | -    | -     | -                             | -   | -    | -   |
| 2,3-butanediol* (R or S isomer) | 4.479                | 90  | -                                         | -    | -     | -    | -                                       | -     | -     | -    | -                      | 100   | 65.96 | -     | -                       | 100   | 100   | 19.48 | -                            | -    | -    | -     | -                             | -   | -    | -   |
| 1,3-Octadiene                   | 4.662                | 110 | -                                         | -    | -     | -    | -                                       | 18.39 | 36.40 | 100  | -                      | -     | -     | -     | 56.20                   | 14.92 | 88.05 | 34.14 | -                            | -    | -    | -     | 100                           | -   | 100  | -   |
| Isovaleric acid*                | 4.667                | 102 | 7.79                                      | 9.84 | 11.82 | 8.78 | -                                       | -     | -     | -    | 8.46                   | 20.40 | -     | -     | -                       | -     | -     | -     | 8.91                         | 4.79 | 4.18 | 12.97 | -                             | -   | -    | -   |
| Isopentyl acetate*              | 4.708                | 130 | -                                         | -    | -     | -    | -                                       | -     | -     | -    | -                      | 105   | 9.40  | 7.5   | -                       | -     | -     | -     | -                            | -    | -    | -     | -                             | -   | -    | -   |
| 2-Methylhexanoic acid           | 5.462                | 116 | -                                         | -    | -     | -    | -                                       | -     | -     | -    | -                      | -     | -     | -     | -                       | -     | -     | -     | 4.04                         | 2.31 | -    | 3.76  | -                             | -   | -    | -   |
| 1-Octen-3-ol* (R, S isomer)     | 7.099                | 128 | -                                         | -    | -     | -    | -                                       | -     | -     | -    | -                      | -     | -     | -     | 100                     | 12.39 | 32.89 | 18.03 | -                            | -    | -    | -     | -                             | -   | -    | -   |
| 3-Octanone*                     | 7.101                | 128 | -                                         | -    | -     | -    | -                                       | -     | -     | -    | -                      | -     | -     | -     | -                       | -     | -     | 20.53 | -                            | -    | -    | -     | -                             | -   | -    | -   |

## Supplementary information

[illegible]
